# Supplementary material for: Dominant Rio1 kinase/ATPase catalytic mutant induces trapping of late pre-40S biogenesis factors in 80S-like ribosomes
Source: PubMed Central journal article supplement — Nucleic Acids Res. 2014 Jun 21;42(13):8635–47. doi: 10.1093/nar/gku542 (PMC4117770; doi:10.1093/nar/gku542), 2014-06-21
Supplement: supp_gku542_nar-00524-r-2014-File007.pdf [file supp_gku542_nar-00524-r-2014-File007.pdf]

## **Supplementary Information**

**Dominant Rio1 kinase/ATPase catalytic mutant induces trapping of late pre-40S biogenesis factors in 80S-like ribosomes**

**Sébastien Ferreira-Cerca, Irene Kiburu, Emma Thomson, Nicole Laronde and Ed Hurt**

**Supplementary Figure 1 & 2**

**Supplementary Table 1 & 2**

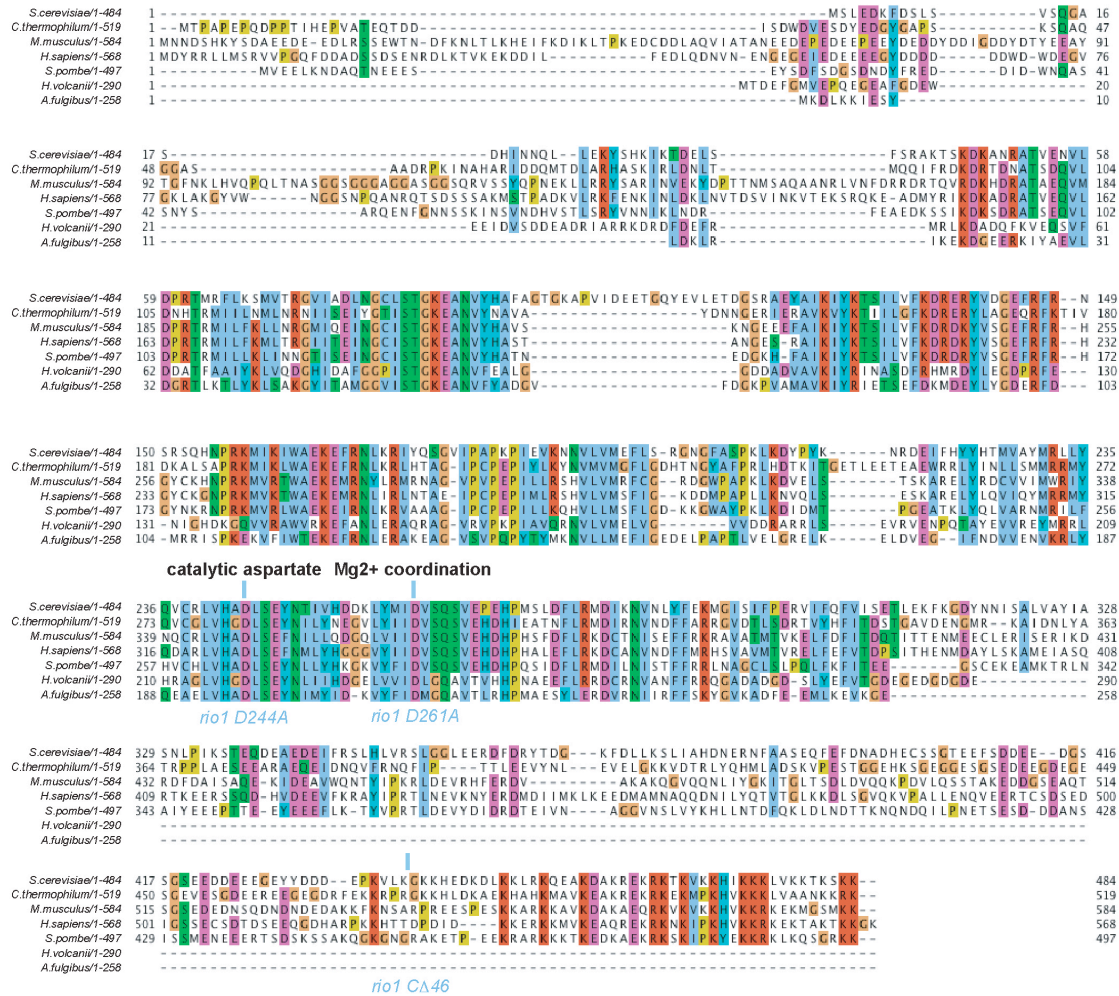

**Supplementary Figure 1 | Multiple sequence alignment of eukaryotic Rio1 in comparison to archaeal Rio1 orthologs.** Sequence alignment of eukaryotic *ctRio1* (*Chaetomium thermophilum*; XP\_006692618.1), *scRio1* (*Saccharomyces cerevisiae*; NP\_014762.3), *mmRio1* (*Mus musculus*; NP\_648489.1), *hsRio1* (*Homo sapiens*; NP\_113668.2), *spRio1* (*Saccharomyces pombe*; NP\_593261.2) in comparison to archaeal *afRio2* (*Archaeoglobus fulgidus*; NP\_070631.1) and *hvRio1* (*Haloferax volcanii*; YP\_003534210.1) using T-Coffee multiple sequence alignment (<http://www.ebi.ac.uk/Tools/msa/tcoffee>) and Jalview. Yeast Rio1 point and deletion mutations are indicated in blue.

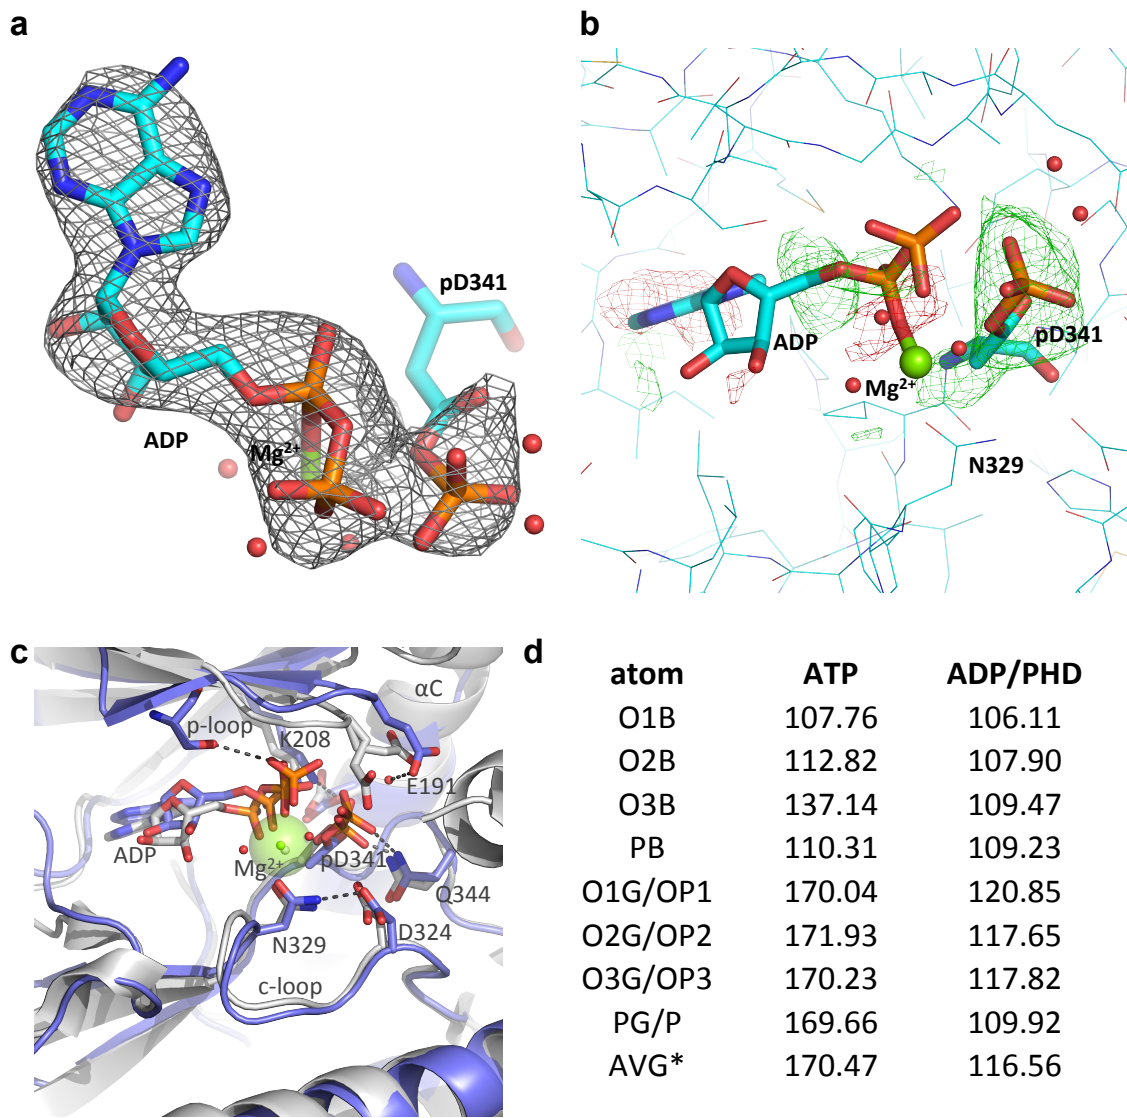

**Supplementary Figure 2 | Electron density maps and fit comparisons for ADP/phosphoaspartate in the structure of human Rio1.** **a.** Composite omit map calculated for the entire asymmetric unit, contoured at  $3\sigma$  and carved at  $3 \text{ \AA}$  around the ADP and the phosphate of pAsp 341. **b.** Difference density ( $F_o - F_c$ ) calculated with omission of transferred phosphate only (green-positive; red-negative). Positive and negative density near ribose and base moieties may be due to slight repositioning of the nucleotide with refinement in the absence of the  $\gamma$ -phosphate. **c.** Superposition of the active sites of human Rio1 (blue) and *C. thermophilum* Rio2 (grey). Catalytic residues, including phosphoaspartate, are shown as sticks, and numbered according to hRio1 sequence. **d.** B-factors (in  $\text{\AA}^3$ ) for the  $\beta$ - and  $\gamma$ -phosphates (PB and PG respectively) when ATP is fit compared to the ADP  $\beta$ -phosphate and the pAsp phosphate (PB and P). \* denotes average of the B-factors for the  $\gamma$ -phosphate of the ATP and the corresponding phosphate of the pAsp for comparison. Occupancies were fixed at 1.00 for all atoms. Lower B-factors, and shape of density, were used to determine the best fit ligand was ADP and phosphoaspartate.

**Supplementary Table 1 | List of strains used in this study.**

| Strain                                        | Genotype                                                                                                                                                                                                     | Plasmid               | Origin                                                                   |
|-----------------------------------------------|--------------------------------------------------------------------------------------------------------------------------------------------------------------------------------------------------------------|-----------------------|--------------------------------------------------------------------------|
| BY4741/WT                                     | Mat <u>a</u> ; his3 $\Delta$ ; leu2 $\Delta$ ; met15 $\Delta$ ;<br>ura3 $\Delta$                                                                                                                             |                       | Euroscarf                                                                |
| <i>Rio1</i> $\Delta$ / <i>RIO1</i><br>diploid | BY4743 Mat <u>a</u> / $\alpha$ ; his3 $\Delta$ /his3 $\Delta$ ;<br>leu2 $\Delta$ /leu2 $\Delta$ ; LYS2/ lys2 $\Delta$ ;<br>MET15/met15 $\Delta$ ; ura3 $\Delta$ /ura3 $\Delta$ ;<br>YOR119c/ YOR119c::kanMX4 |                       | Euroscarf                                                                |
| <i>RIO1</i> shuffle<br>strain                 | Mat <u>a</u> ; his3 $\Delta$ ; leu2 $\Delta$ ; lys2 $\Delta$ ;<br>met15 $\Delta$ ; ura3 $\Delta$ ;<br>YOR119c::kanMX4                                                                                        | Ycplac33- <i>RIO1</i> | this work: derived<br>from <i>rio1</i> $\Delta$ / <i>RIO1</i><br>diploid |
| <i>GAL</i> :: <i>RIO1</i>                     | Mat <u>a</u> ; his3 $\Delta$ ; leu2 $\Delta$ ; met15 $\Delta$ ;<br>ura3 $\Delta$ ; NatMX6::P <sub>GAL</sub> -3xHA- <i>RIO1</i>                                                                               |                       | this work; derived<br>from BY4741                                        |

**Supplementary Table 2 | List of plasmids used in this study.**

| Plasmid                                              | Features                                                                                         | Origin                                                         |
|------------------------------------------------------|--------------------------------------------------------------------------------------------------|----------------------------------------------------------------|
| Ycplac33-Rio1                                        | <i>CEN</i> ; <i>URA3</i> ; <i>RIO1</i> ORF including 400nt before ATG and 220nt after stop codon | this study                                                     |
| P <sub>ADH1</sub> -ProtA-Tev-Flag-Nob1               | <i>CEN</i> ; <i>LEU2</i> ;                                                                       | (1)                                                            |
| P <sub>ADH1</sub> -ProtA-Tev-Flag-Rio1               | <i>CEN</i> ; <i>LEU2</i> ;                                                                       | this study derived from P <sub>ADH1</sub> -Flag-Tev-ProtA-Nob1 |
| P <sub>ADH1</sub> -ProtA-Tev-Flag- <i>rio1</i> D244A | <i>CEN</i> ; <i>LEU2</i> ;                                                                       | this study derived from P <sub>ADH1</sub> -Flag-Tev-ProtA-Nob1 |
| P <sub>ADH1</sub> -ProtA-Tev-Flag- <i>rio1CΔ46</i>   | <i>CEN</i> ; <i>LEU2</i> ;                                                                       | this study derived from pADH1-Flag-Tev-ProtA-Nob1              |
| P <sub>ADH1</sub> -ProtA-Tev-Flag- <i>rio1CΔ80</i>   | <i>CEN</i> ; <i>LEU2</i> ;                                                                       | this study derived from P <sub>ADH1</sub> -Flag-Tev-ProtA-Nob1 |
| P <sub>ADH1</sub> -Rio2-Flag-Tev-ProtA               | <i>CEN</i> ; <i>LEU2</i> ;                                                                       | this study derived from P <sub>ADH1</sub> -Flag-Tev-ProtA-Nob1 |
| pET24a- <i>ctRio1</i>                                | Kanamycin                                                                                        | this study                                                     |
| pET24a- <i>ctRio1</i> D244A                          | Kanamycin                                                                                        | this study                                                     |
| pET24a- <i>ctRio1</i> D261A                          | Kanamycin                                                                                        | this study                                                     |

|                                               |                                                          |                                                   |
|-----------------------------------------------|----------------------------------------------------------|---------------------------------------------------|
| pET24a- <i>ctRio1C</i> Δ80                    | Kanamycin                                                | this study                                        |
| pDEST527- <i>hsRio1</i> (143-494)             | Ampicillin                                               | this study                                        |
| YEP352-GAL:: <i>RIO1</i>                      | 2μ; URA3; <i>RIO1</i> ORF under GAL promoter             | this study                                        |
| YEP352-GAL:: <i>RIO1 D244A</i>                | 2μ; URA3; <i>RIO1 D244A</i> ORF under GAL promoter       | this study, derived from YEP352-GAL:: <i>RIO1</i> |
| YEP352-GAL:: <i>RIO1 C</i> Δ46                | 2μ; URA3; <i>RIO1 C</i> Δ46 ORF under GAL promoter       | this study                                        |
| YEP352-GAL:: <i>RIO1 D244A C</i> Δ46          | 2μ; URA3; <i>RIO1 D244A C</i> Δ46 ORF under GAL promoter | this study                                        |
| YEP352-GAL:: <i>ProtA-TEV-Flag-RIO1</i>       | 2μ; URA3; <i>RIO1</i> ORF under GAL promoter             | this study                                        |
| YEP352-GAL:: <i>ProtA-TEV-Flag-rio1 D244A</i> | 2μ; URA3; <i>RIO1</i> ORF under GAL promoter             | this study                                        |

1. Pertschy, B., Schneider, C., Gnadig, M., Schafer, T., Tollervey, D. and Hurt, E. (2009) RNA helicase Prp43 and its co-factor Pfa1 promote 20 to 18 S rRNA processing catalyzed by the endonuclease Nob1. *J Biol Chem*, **284**, 35079-35091.
